# Supplementary material
Source: publisher figshare collection journal article supplement (https://future-science-group.figshare.com/ndownloader/files/18028241)
Supplement: Supplementary file 1 [file 18028241]

## Sheet: Sheet1
Table S6 Primers used in mutation discovery from the sodium azide induced rice population
Primer names	Target region names	Sequencing(5’-3’)
ITSP1-13	Os06g10350-1	AGATCGCTCAGTCTCACACCGCACA
ITSP1-14	Os06g10350-2	AATCGATCGATGGTCATCGATCATG
ITSP1-15	Os06g10350-3	GTTGTCAGGTGGTCTCTCATTGCAG
ITSP1-16	OsUGT-1	ATGGAGCCTCACGTCCTCCTCG
ITSP1-17	OsUGT-2	AACGACGTGCTGTCGCACGTCAC
ITSP1-18	Os07g11440-1	TTGGAAAAGGGTACAACGTTCTGGC
ITSP1-19	Os07g11440-2	CCATGATATATGCAGGTGAAAGCTC
ITSP1-20	Os07g11440-3	AGATTGTGTCGGCGAGCCAGACCAT
ITSP1-21	Os07g32620-1	CAAAACCATTGCAGCAAACTACGCC
ITSP1-22	Os07g32620-2	ATGCTGGACAGGAAGAAGTCGACGT
ITSP1-23	Cyp51G3-5	ACAGTCCGGCACTGTGAACATGAAG
ITSP1-24	CYP51H5-1	CACTTGTGTTAGCTAGGCTTGACCG
ITSP1-25	OsOSC7-6	CTTACATCGCACCTACCTGGTTTGT
ITSP1-26	OsOSC7-7	CATGACAGGTGTATGATGGTTGTCA
ITSP1-27	OsOSC7-8	CCACTTCACAATATGTGTGGAGAGC
ITSP1-28	OsOSC7-9	GCCTCGGAGATTGTCAACACATAAT
ITSP1-29	OsOSC11-4	CCACTTGAGAATGGTCGGAGTTTGT
ITSP1-30	OsOSC11-5	AGCAATATTGATGCATGCTTGGGTG
ITSP1-31	OsOSC11-6	TGGACATCAGAAAAACTGAGTCACC
ITSP1-32	OsOSC11-7	TGGGTCAGAGAAATATGAAGGGAGG
ITSP1-33	OsOSC11-8	GGCATTCCCTTATTTGACTGGAGGC
ITSP1-34	OsOSC11-9	CCGCTGCCACACATATGCCACATAG
ITSP1-35	OsOSC11-10	GCTTACTGTCCCATTGATCGATGAA
ITSP1-36	OsOSC11-11	CGTGGTATGCATGGTGTATTCCTAC
ITSP1-37	OsCAP1-1	ATGCTTGCAACTTCTGTTGGCTCAG
ITSP1-38	OsCAP1-2	CATCGAATTCGTCGCAATTCGCACC
ITSP1-39	OsCAP1-3	CATGTTCGACTCTTGACACGCTCAC
ITSP1-40	OsCAP1-4	CGGATAGAACTGGTGTTGTAGCTGC
ITSP1-41	OsCAP1-5	CATGAGATGCATTATTGTTGACACG
ITSP1-42	OsOSC3-1	CCACGAGCAATTCAGACGAGCTAAG
ITSP1-43	OsOSC3-2	TTCAGATGACAAAGCAGTGTTCAGC
ITSP1-44	OsOSC3-7	TTGCAGCTGCACATGTATTCCATTC
ITSP1-45	OsOSC3-9	AGCCACAGGTAAGTAATGAGATGGC
ITSP1-46	OsOSC3-10	GCAGACAATTGCTATGGAACAGACT
ITSP1-47	OsUGT-3	CTCCGTGCTGTCGATATACTACCAC
ITSP1-48	OsUGT-4	AACTCGTTCTACGAGCTCGAGCGC
ITSP2-13	Os06g10350-1-2r	TACACGACGCTCTTCCGATCTAGCTCTAGAGAGAACGAGAG
ITSP2-14	Os06g10350-2r	TACACGACGCTCTTCCGATCTTCTTGCGATCGATCGATCTG
ITSP2-15	Os06g10350-3-2r	TACACGACGCTCTTCCGATCTTACTGGAACAGCACGCTCAG
ITSP2-16	OsUGT-1-2r	TACACGACGCTCTTCCGATCTTATGCAGGGCCACGTCAACC
ITSP2-17	OsUGT-2-2r	TACACGACGCTCTTCCGATCTGCTCGCCGAGTTCATCGACG
ITSP2-18	Os07g11440-1-2r	TACACGACGCTCTTCCGATCTTGAGTGGGGAGATGGTGACA
ITSP2-19	Os07g11440-2-2r	TACACGACGCTCTTCCGATCTTACACGCATCTTACTGAGGA
ITSP2-20	Os07g11440-3-2r	TACACGACGCTCTTCCGATCTAAGGACGTCCCGGAGTTCAT
ITSP2-21	Os07g32620-1-2r	TACACGACGCTCTTCCGATCTATTCGCACAGTAGCAGGACA
ITSP2-22	Os07g32620-2-2r	TACACGACGCTCTTCCGATCTAGGGGCTACATGAACGCCAC
ITSP2-23	Cyp51G3-5-2r	TACACGACGCTCTTCCGATCTGAGTTTGAACAACTCGTCAC
ITSP2-24	CYP51H5-1-2r	TACACGACGCTCTTCCGATCTCTGACCATCACTAGTCTCGT
ITSP2-25	OsOSC7-6-2r	TACACGACGCTCTTCCGATCTGCAGCTCGTTAACAACCTTT
ITSP2-26	OsOSC7-7-2r	TACACGACGCTCTTCCGATCTGCTGGGAAACAGCTTTTATT
ITSP2-27	OsOSC7-8-2r	TACACGACGCTCTTCCGATCTGATAGATCCGTTGAATGCAC
ITSP2-28	OsOSC7-9-2r	TACACGACGCTCTTCCGATCTTGACAGGTTTATGTGGAGGC
ITSP2-29	OsOSC11-4-2r	TACACGACGCTCTTCCGATCTATTATACTGCTGCTTTGCAC
ITSP2-30	OsOSC11-5-2r	TACACGACGCTCTTCCGATCTTTCCGTTGAGTCATCACATC
ITSP2-31	OsOSC11-6-2r	TACACGACGCTCTTCCGATCTTCAGTAATGTGTGGCTTCAT
ITSP2-32	OsOSC11-7-2r	TACACGACGCTCTTCCGATCTGGAAAAGACACCAAACTCGT
ITSP2-33	OsOSC11-8-2r	TACACGACGCTCTTCCGATCTCGCGTGATACTAACTTTGAG
ITSP2-34	OsOSC11-9-2r	TACACGACGCTCTTCCGATCTGAGGTGAGGAATGTCTAATA
ITSP2-35	OsOSC11-10-2r	TACACGACGCTCTTCCGATCTGTTTCCAATCTAGTCTTACC
ITSP2-36	OsOSC11-11-2r	TACACGACGCTCTTCCGATCTATCACAGGTATGGATCTTGG
ITSP2-37	OsCAP1-1-2r	TACACGACGCTCTTCCGATCTCTCAAATGCCTTAGCGATCC
ITSP2-38	OsCAP1-2-2r	TACACGACGCTCTTCCGATCTGTGTTCGATCGCTTTGACAC
ITSP2-39	OsCAP1-3-2r	TACACGACGCTCTTCCGATCTGTTGTCCAGTGTGTTTCAGC
ITSP2-40	OsCAP1-4-2r	TACACGACGCTCTTCCGATCTTTGGAGCTCCAAATGGGTCG
ITSP2-41	OsCAP1-5-2r	TACACGACGCTCTTCCGATCTTGATTAAGCATGCTTCTCTG
ITSP2-42	OsOSC3-1-2r	TACACGACGCTCTTCCGATCTAGTACAGTAGTAGGAGCGAG
ITSP2-43	OsOSC3-2-2r	TACACGACGCTCTTCCGATCTAACGACTTGTGGTGAGTTAG
ITSP2-44	OsOSC3-7-2r	TACACGACGCTCTTCCGATCTAGTGTGTACCCATATAATGG
ITSP2-45	OsOSC3-9-2r	TACACGACGCTCTTCCGATCTCGTATAAGGGAACATGCATG
ITSP2-46	OsOSC3-10-2r	TACACGACGCTCTTCCGATCTTTCTCATGCATACCAGAGAG
ITSP2-47	OsUGT-3-2R	TACACGACGCTCTTCCGATCTACGAGTCGCCCGAGGCGTT
ITSP2-48	OsUGT-4-2R	TACACGACGCTCTTCCGATCTGCACACGACGGTCAAGCTC
